# Supplementary material
Source: PubMed Central journal article supplement (PMC8725278)

## Distribution of White participants (n = 137,628) by WHI clinic (%)

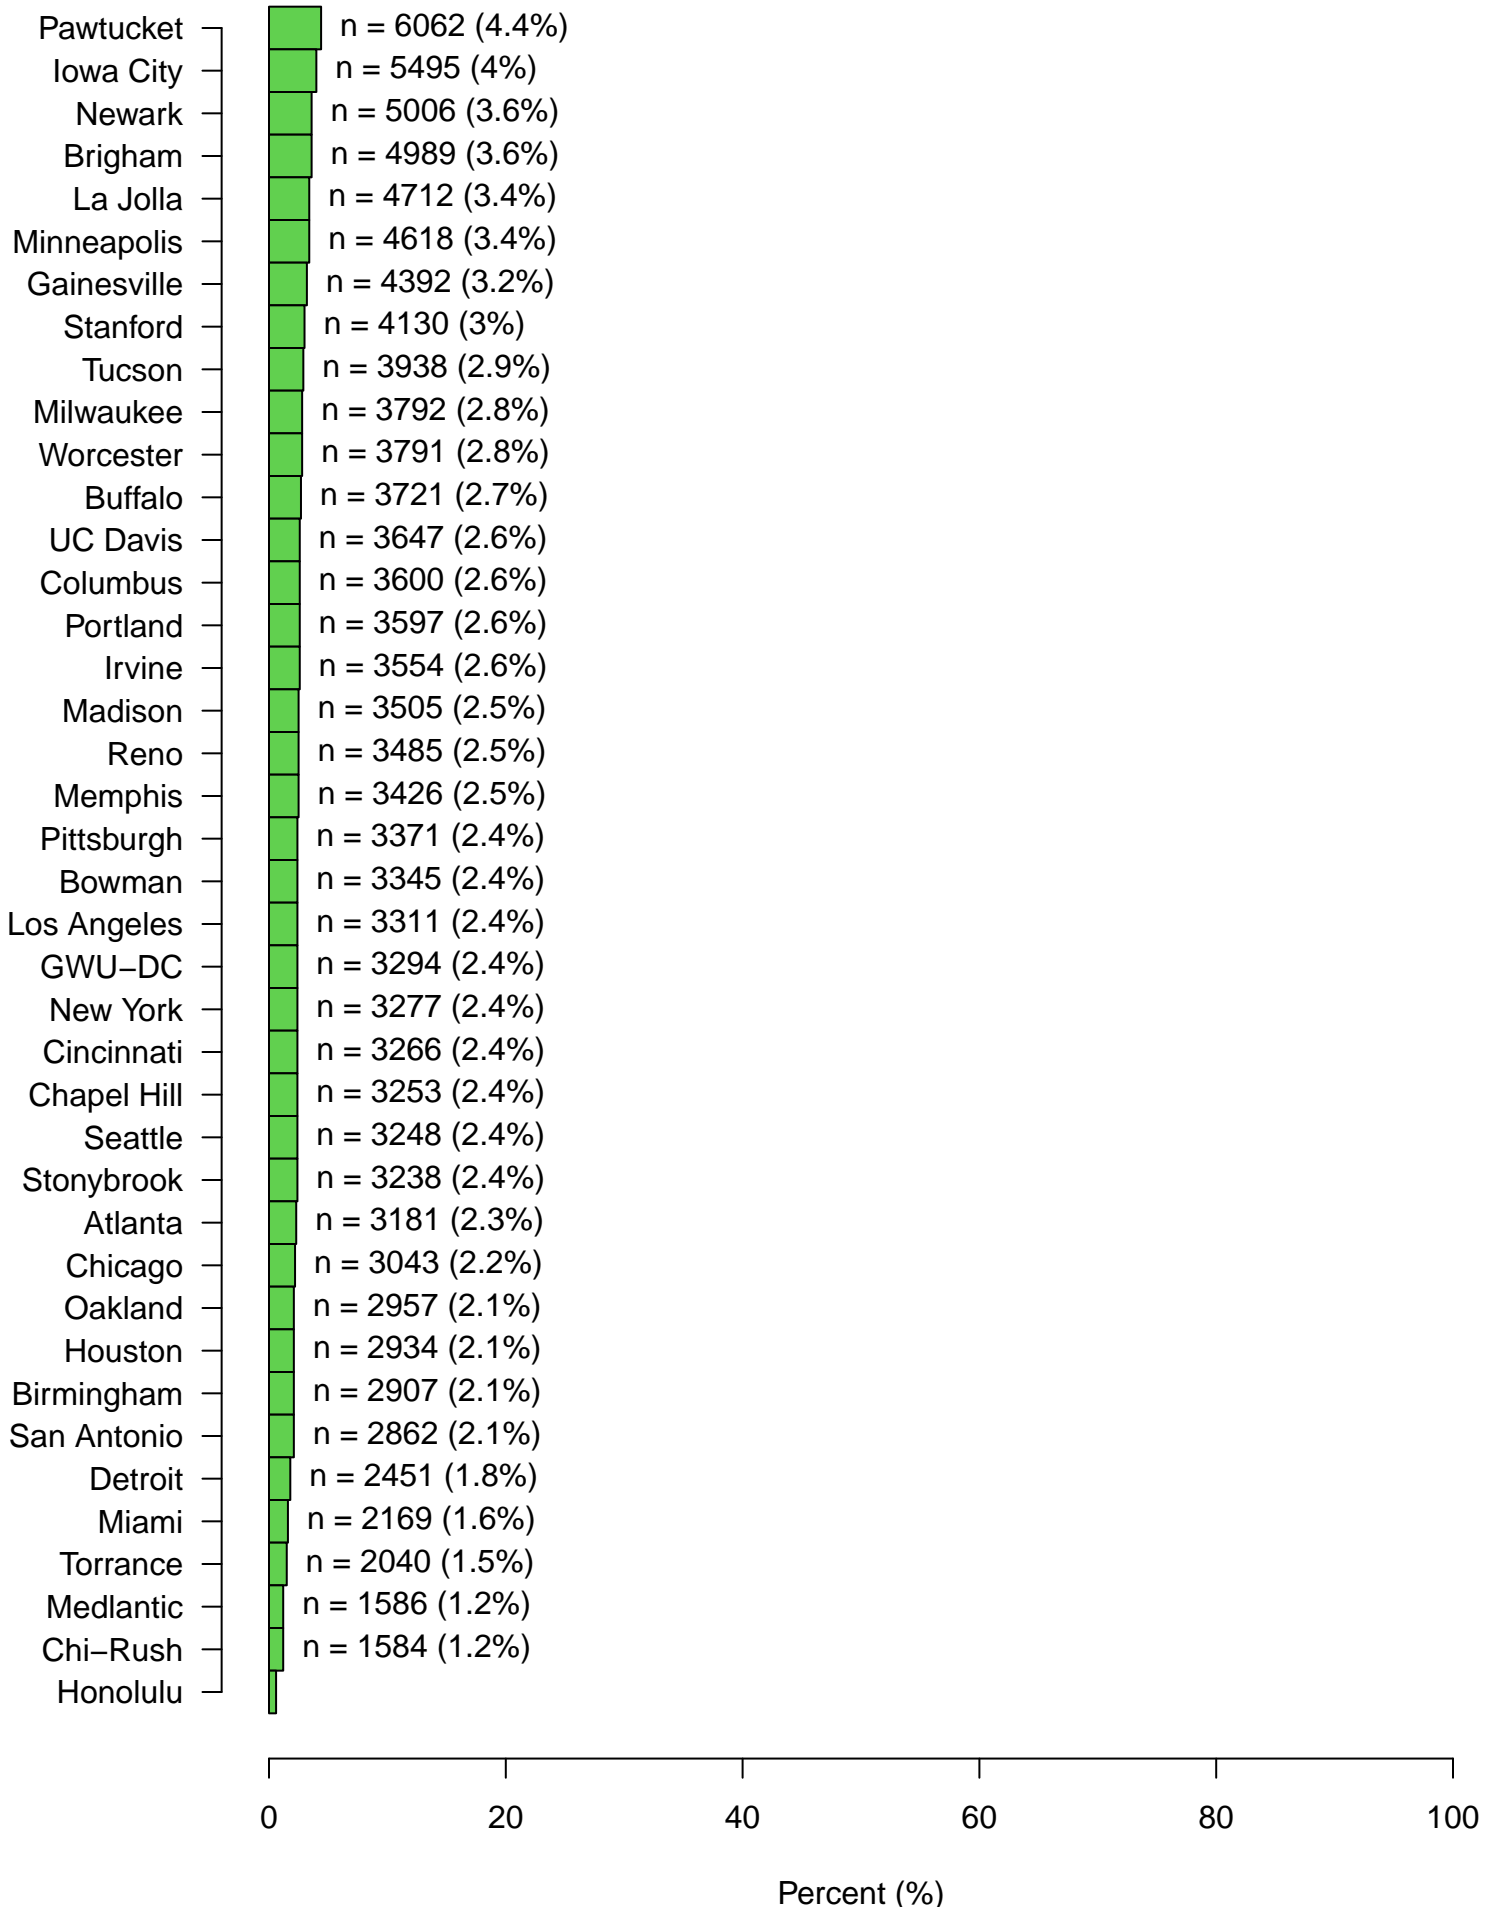

Supplement: 40695_2021_71_MOESM1_ESM.pdf [file 40695_2021_71_MOESM1_ESM.pdf]
