# Supplementary material
Source: PubMed Central journal article supplement (PMC8725278)

## Distribution of Black participants (n = 14,327) by WHI clinic (%)

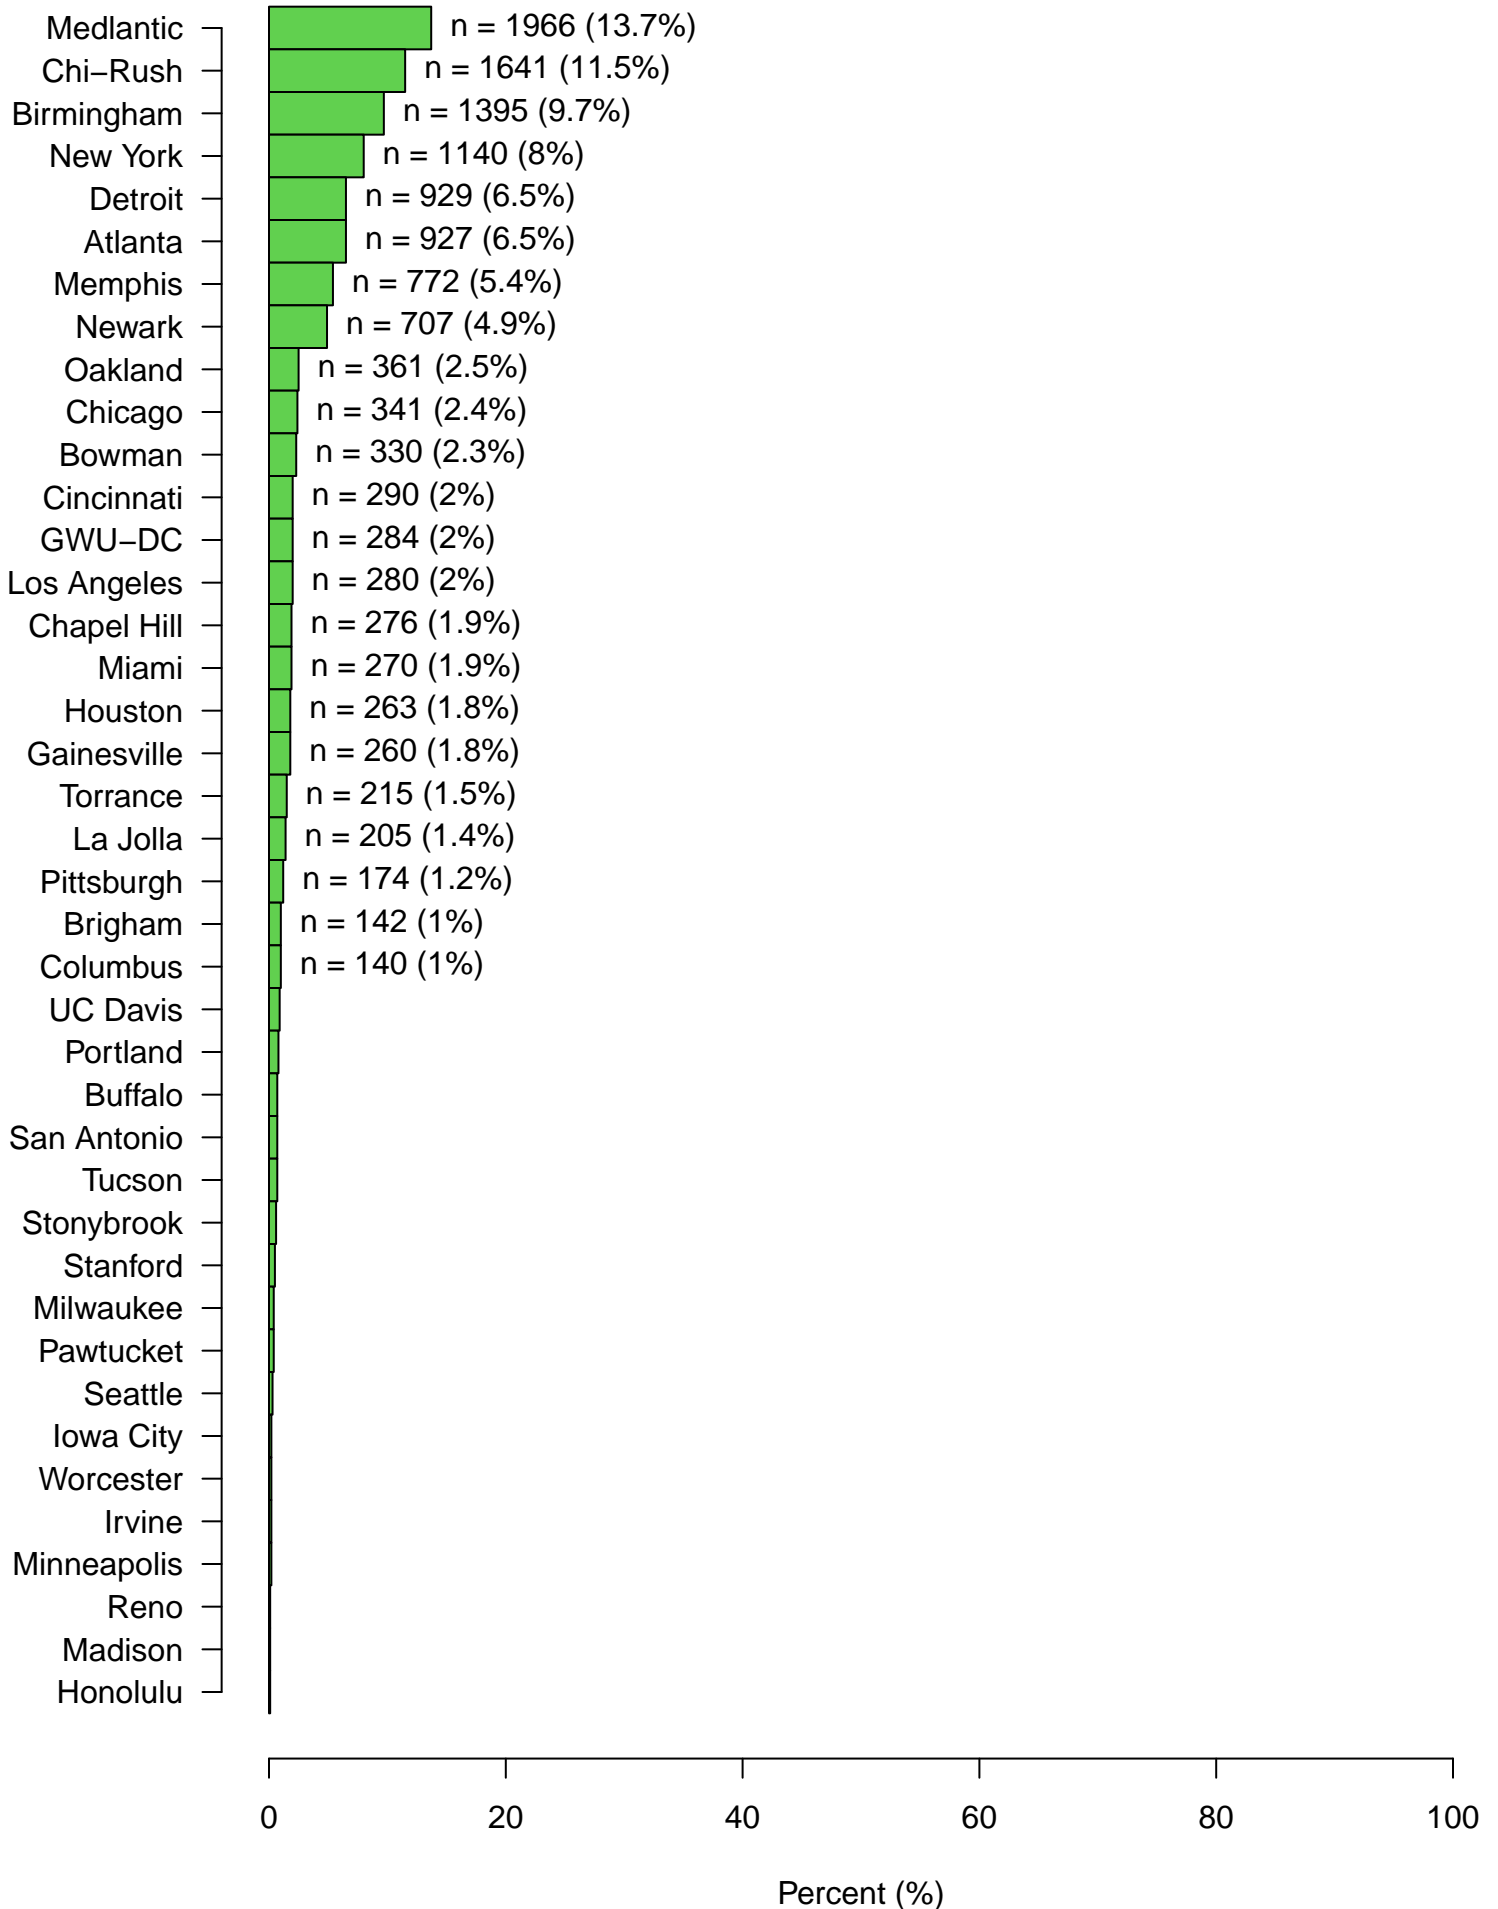

Supplement: 40695_2021_71_MOESM2_ESM.pdf [file 40695_2021_71_MOESM2_ESM.pdf]
