# Supplementary material
Source: PubMed Central journal article supplement (PMC8725278)

## Distribution of Asian participants (n = 4025) by WHI clinic

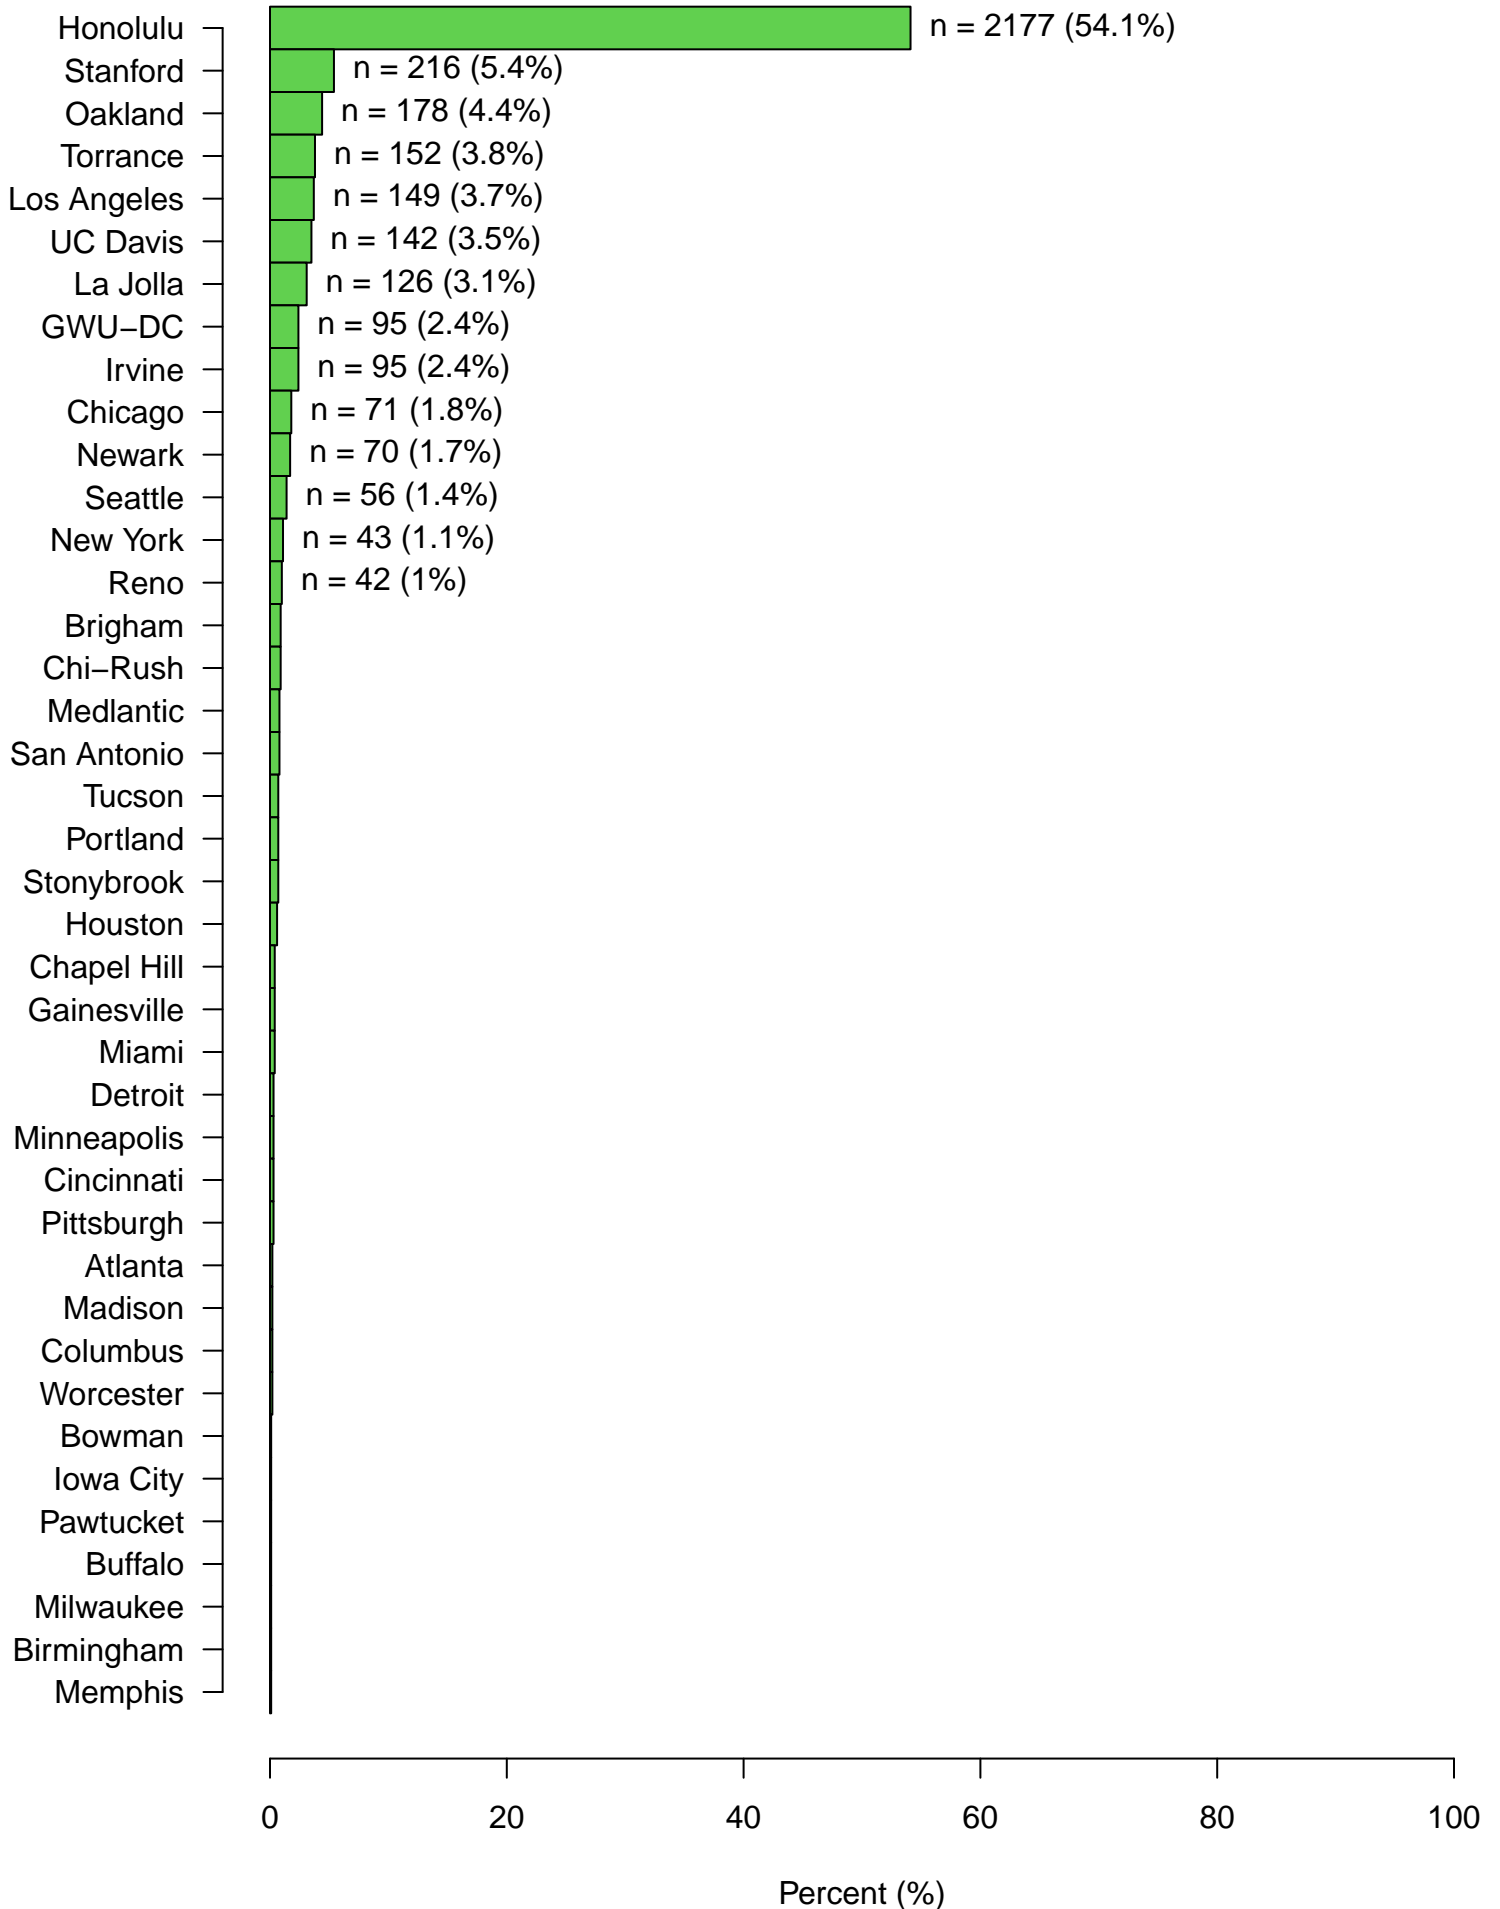

Supplement: 40695_2021_71_MOESM3_ESM.pdf [file 40695_2021_71_MOESM3_ESM.pdf]
