# Supplementary material
Source: PubMed Central journal article supplement (PMC8725278)

# Distribution of American indian participants (n = 540) by WHI clinic (%)

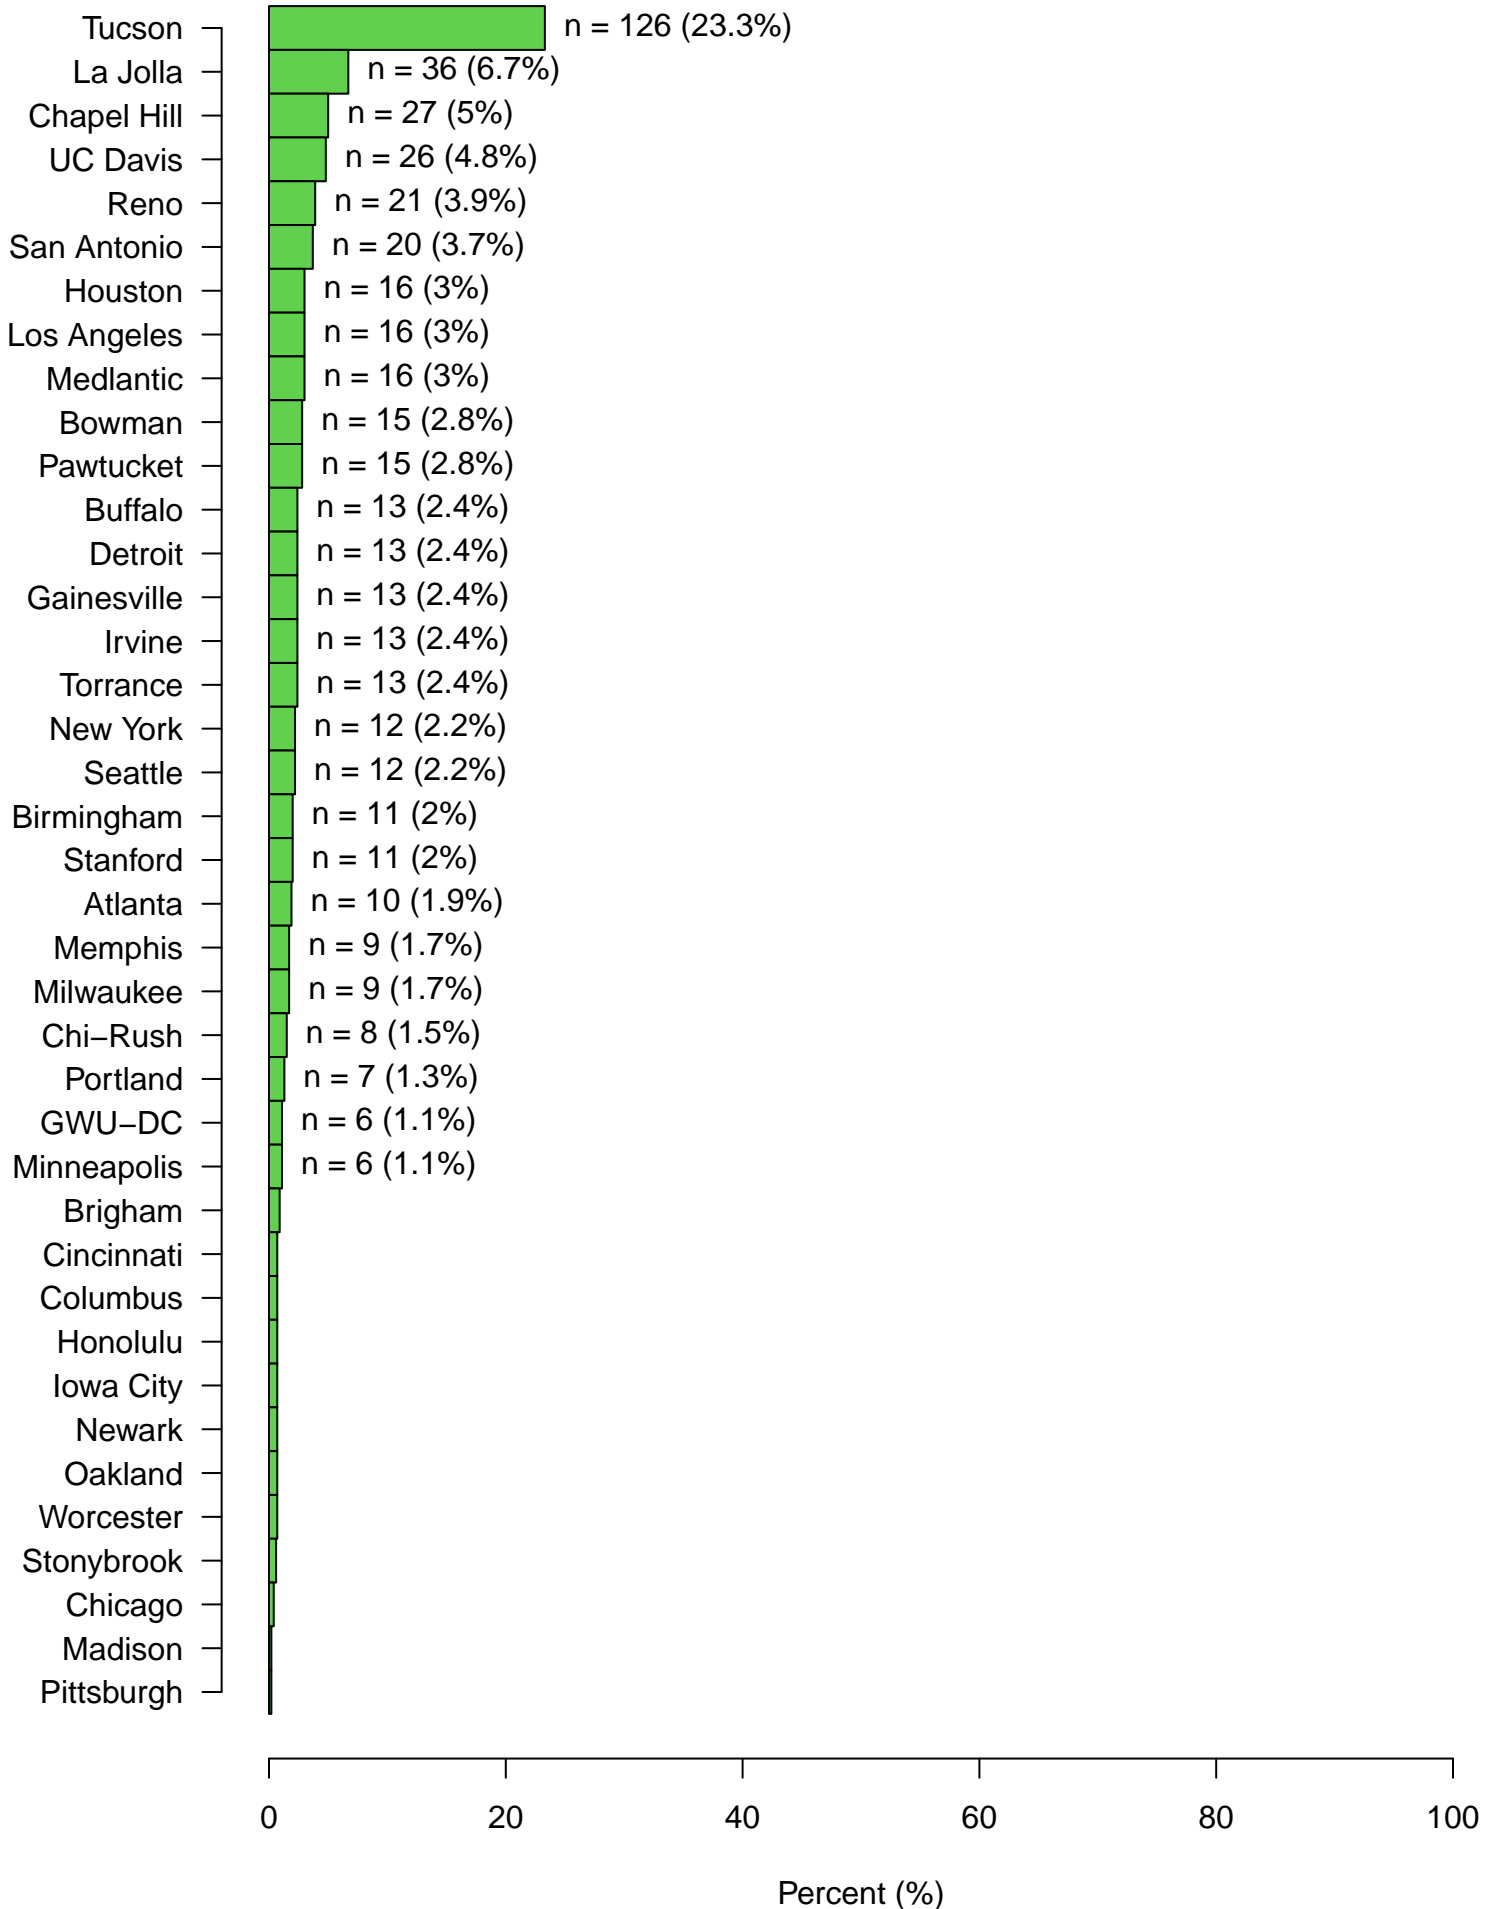

Supplement: 40695_2021_71_MOESM4_ESM.pdf [file 40695_2021_71_MOESM4_ESM.pdf]
