# Supplementary material
Source: PubMed Central journal article supplement (PMC8725278)

**Distribution of Pacific Islander participants (n = 137) by WHI clinic (%)**

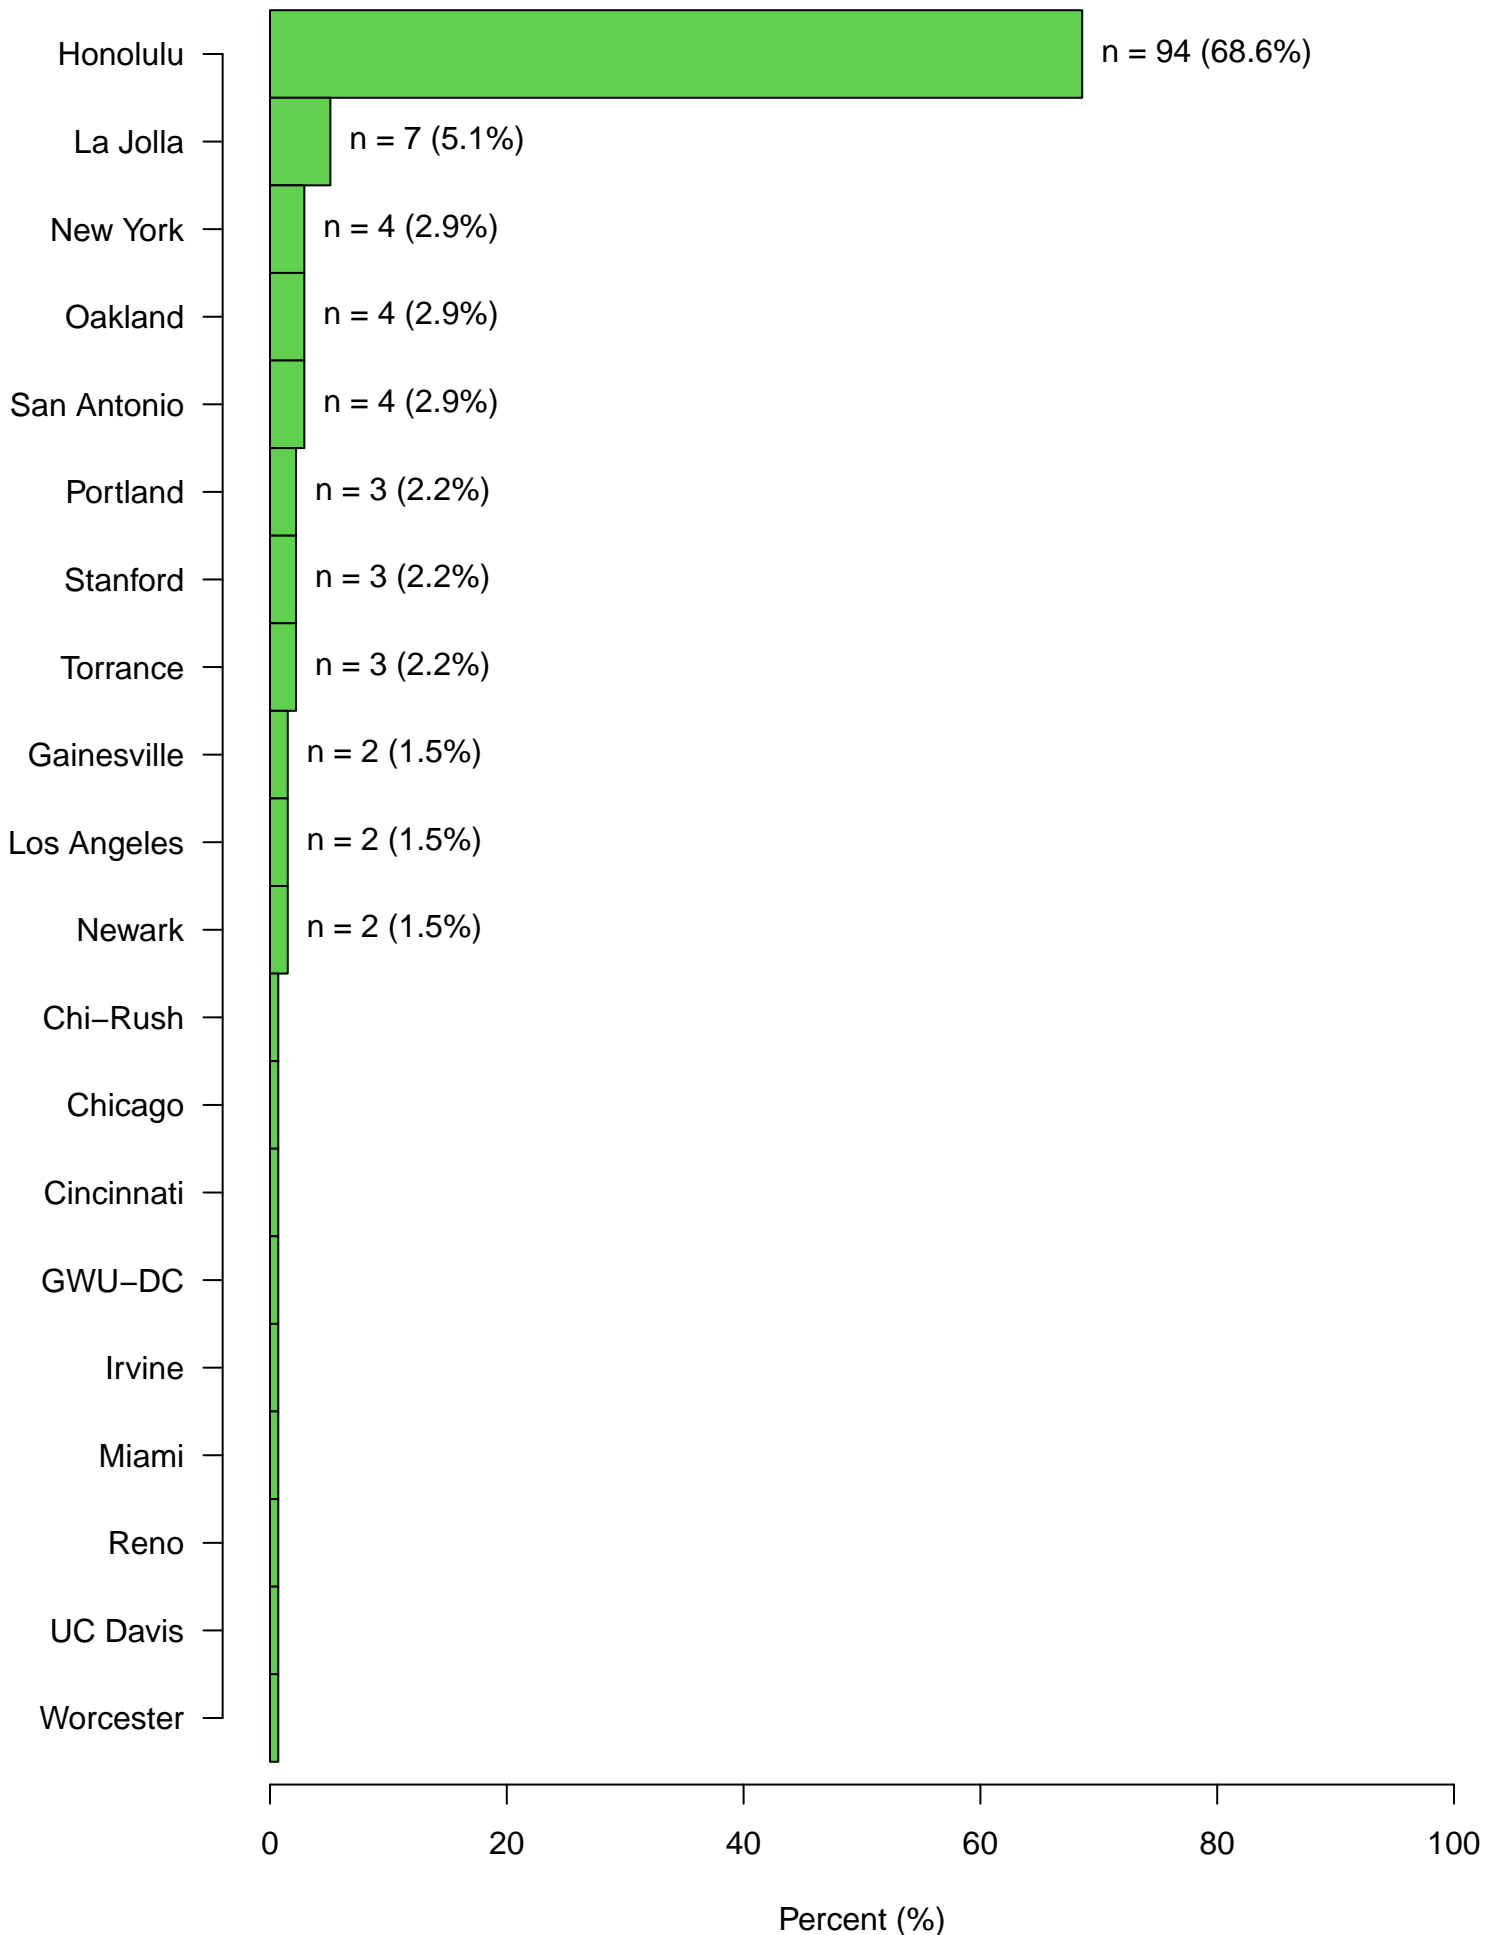

Supplement: 40695_2021_71_MOESM5_ESM.pdf [file 40695_2021_71_MOESM5_ESM.pdf]
